# Supplementary material for: Effects of cyclin-dependent kinase inhibitor Purvalanol B application on protein expression and developmental progression in intra-erythrocytic Plasmodium falciparum parasites
Source: Springer Nature journal article supplement (doi:10.1186/s12936-015-0655-x), 2015-04-07
Supplement: MOESM1 [file 9761184]

*Proteins in Only P. falciparum Control Samples.* Column one provides the protein name and column two the accession number of each protein. Any identifications made from the reverse concatenated database are not represented.

| <i>Protein</i>                                                                                                        | <i>Accession Number</i> |
|-----------------------------------------------------------------------------------------------------------------------|-------------------------|
| Putative uncharacterized protein OS=Plasmodium falciparum (isolate 3D7) GN=MAL8P1.103 PE=4 SV=1                       | C0H4U0_PLAF7            |
| Conserved Plasmodium protein OS=Plasmodium falciparum (isolate 3D7) GN=PFL2120w PE=4 SV=1                             | Q8I4Y9_PLAF7            |
| Putative uncharacterized protein OS=Plasmodium falciparum (isolate 3D7) GN=PFE1465w PE=4 SV=1                         | C0H4G7_PLAF7            |
| DNA repair protein, putative OS=Plasmodium falciparum (isolate 3D7) GN=PFE0270c PE=3 SV=1                             | Q8I447_PLAF7            |
| Histidine--tRNA ligase, putative OS=Plasmodium falciparum (isolate 3D7) GN=PF14_0428 PE=4 SV=1                        | Q8IL22_PLAF7            |
| 40S ribosomal protein S28e, putative OS=Plasmodium falciparum (isolate 3D7) GN=PF14_0585 PE=4 SV=1                    | Q8IKL9_PLAF7            |
| 10b antigen, putative OS=Plasmodium falciparum (isolate 3D7) GN=PF10_0213 PE=4 SV=1                                   | Q8IJI4_PLAF7            |
| Ubiquitination-mediated degradation component, putative OS=Plasmodium falciparum (isolate 3D7) GN=PF08_0020 PE=4 SV=1 | C0H4Y0_PLAF7            |
| Putative uncharacterized protein OS=Plasmodium falciparum (isolate 3D7) GN=PF07_0016 PE=4 SV=1                        | Q8IC27_PLAF7            |
| Vacuolar ATP synthase subunit E, putative OS=Plasmodium falciparum (isolate 3D7) GN=PFI1670c PE=3 SV=2                | Q8I2H3_PLAF7            |
| V-type ATPase, subunit C, putative OS=Plasmodium falciparum (isolate 3D7) GN=PFA_0300c PE=4 SV=1                      | Q8I280_PLAF7            |
| Arginyl-tRNA synthetase, putative OS=Plasmodium falciparum (isolate 3D7) GN=PFL0900c PE=3 SV=1                        | Q8I5M2_PLAF7            |
| Conserved Plasmodium protein OS=Plasmodium falciparum (isolate 3D7) GN=PF11_0332 PE=4 SV=1                            | Q8II42_PLAF7            |
| Putative uncharacterized protein OS=Plasmodium falciparum (isolate 3D7) GN=PFE0990w PE=4 SV=1                         | C0H4F1_PLAF7            |
| Proteasome, putative OS=Plasmodium falciparum (isolate 3D7) GN=PFI1545c PE=4 SV=1                                     | Q8I0U7_PLAF7            |
| DNA-directed RNA polymerase OS=Plasmodium falciparum (isolate 3D7) GN=PFC0805w PE=3 SV=1                              | O77375_PLAF7            |
| P-type calcium transporting ATPase OS=Plasmodium falciparum GN=serca PE=3 SV=1                                        | E1CC54_PLAFA            |
| 60S ribosomal protein L23a, putative OS=Plasmodium falciparum (isolate 3D7) GN=PF13_0132 PE=3 SV=1                    | Q8IE82_PLAF7            |
| Coatmer alpha subunit, putative OS=Plasmodium falciparum (isolate 3D7) GN=PFF0330w PE=4 SV=1                          | C6KSR5_PLAF7            |
| Pfmdr2 protein OS=Plasmodium falciparum GN=pfmdr2 PE=3 SV=1                                                           | Q25693_PLAFA            |
| 60S ribosomal protein L14, putative OS=Plasmodium falciparum (isolate 3D7) GN=PF14_0296 PE=4 SV=1                     | Q8ILE8_PLAF7            |

| <i>Protein</i>                                                                                                        | <i>Accession Number</i> |
|-----------------------------------------------------------------------------------------------------------------------|-------------------------|
| Putative uncharacterized protein OS=Plasmodium falciparum (isolate 3D7) GN=MAL8P1.103 PE=4 SV=1                       | C0H4U0_PLAF7            |
| Conserved Plasmodium protein OS=Plasmodium falciparum (isolate 3D7) GN=PFL2120w PE=4 SV=1                             | Q8I4Y9_PLAF7            |
| Putative uncharacterized protein OS=Plasmodium falciparum (isolate 3D7) GN=PFE1465w PE=4 SV=1                         | C0H4G7_PLAF7            |
| DNA repair protein, putative OS=Plasmodium falciparum (isolate 3D7) GN=PFE0270c PE=3 SV=1                             | Q8I447_PLAF7            |
| Histidine--tRNA ligase, putative OS=Plasmodium falciparum (isolate 3D7) GN=PF14_0428 PE=4 SV=1                        | Q8IL22_PLAF7            |
| 40S ribosomal protein S28e, putative OS=Plasmodium falciparum (isolate 3D7) GN=PF14_0585 PE=4 SV=1                    | Q8IKL9_PLAF7            |
| 10b antigen, putative OS=Plasmodium falciparum (isolate 3D7) GN=PF10_0213 PE=4 SV=1                                   | Q8IJI4_PLAF7            |
| Ubiquitination-mediated degradation component, putative OS=Plasmodium falciparum (isolate 3D7) GN=PF08_0020 PE=4 SV=1 | C0H4Y0_PLAF7            |
| Putative uncharacterized protein OS=Plasmodium falciparum (isolate 3D7) GN=PF07_0016 PE=4 SV=1                        | Q8IC27_PLAF7            |
| Vacuolar ATP synthase subunit E, putative OS=Plasmodium falciparum (isolate 3D7) GN=PF11670c PE=3 SV=2                | Q8I2H3_PLAF7            |
| V-type ATPase, subunit C, putative OS=Plasmodium falciparum (isolate 3D7) GN=PFA_0300c PE=4 SV=1                      | Q8I280_PLAF7            |
| Arginyl-tRNA synthetase, putative OS=Plasmodium falciparum (isolate 3D7) GN=PFL0900c PE=3 SV=1                        | Q8I5M2_PLAF7            |
| Conserved Plasmodium protein OS=Plasmodium falciparum (isolate 3D7) GN=PF11_0332 PE=4 SV=1                            | Q8II42_PLAF7            |
| Putative uncharacterized protein OS=Plasmodium falciparum (isolate 3D7) GN=PFE0990w PE=4 SV=1                         | C0H4F1_PLAF7            |
| Proteasome, putative OS=Plasmodium falciparum (isolate 3D7) GN=PF11545c PE=4 SV=1                                     | Q8I0U7_PLAF7            |
| DNA-directed RNA polymerase OS=Plasmodium falciparum (isolate 3D7) GN=PFC0805w PE=3 SV=1                              | O77375_PLAF7            |
| P-type calcium transporting ATPase OS=Plasmodium falciparum GN=serca PE=3 SV=1                                        | E1CC54_PLAFA            |
| 60S ribosomal protein L23a, putative OS=Plasmodium falciparum (isolate 3D7) GN=PF13_0132 PE=3 SV=1                    | Q8IE82_PLAF7            |
| Coatomer alpha subunit, putative OS=Plasmodium falciparum (isolate 3D7) GN=PFF0330w PE=4 SV=1                         | C6KSR5_PLAF7            |
| Pfmdr2 protein OS=Plasmodium falciparum GN=pfmdr2 PE=3 SV=1                                                           | Q25693_PLAFA            |
| 60S ribosomal protein L14, putative OS=Plasmodium falciparum (isolate 3D7) GN=PF14_0296 PE=4 SV=1                     | Q8ILE8_PLAF7            |
