# Supplementary material for: Effects of cyclin-dependent kinase inhibitor Purvalanol B application on protein expression and developmental progression in intra-erythrocytic Plasmodium falciparum parasites
Source: Springer Nature journal article supplement (doi:10.1186/s12936-015-0655-x), 2015-04-07
Supplement: MOESM2 [file 9761184]

*Proteins Only in P. falciparum Treatment Samples.* Column one provides the protein name and column two the accession number for each protein. Any identifications made from the reverse concatenated database are not represented.

| <i>Protein</i>                                                                                                              | <i>Accession Number</i> |
|-----------------------------------------------------------------------------------------------------------------------------|-------------------------|
| Putative uncharacterized protein<br>OS=Plasmodium falciparum (isolate 3D7)<br>GN=MAL8P1.103 PE=4 SV=1                       | C0H4U0_PLAF7            |
| Conserved Plasmodium protein OS=Plasmodium<br>falciparum (isolate 3D7) GN=PFL2120w PE=4<br>SV=1                             | Q8I4Y9_PLAF7            |
| Putative uncharacterized protein<br>OS=Plasmodium falciparum (isolate 3D7)<br>GN=PFE1465w PE=4 SV=1                         | C0H4G7_PLAF7            |
| DNA repair protein, putative OS=Plasmodium<br>falciparum (isolate 3D7) GN=PFE0270c PE=3<br>SV=1                             | Q8I447_PLAF7            |
| Histidine--tRNA ligase, putative OS=Plasmodium<br>falciparum (isolate 3D7) GN=PF14_0428 PE=4<br>SV=1                        | Q8IL22_PLAF7            |
| 40S ribosomal protein S28e, putative<br>OS=Plasmodium falciparum (isolate 3D7)<br>GN=PF14_0585 PE=4 SV=1                    | Q8IKL9_PLAF7            |
| 10b antigen, putative OS=Plasmodium falciparum<br>(isolate 3D7) GN=PF10_0213 PE=4 SV=1                                      | Q8IJI4_PLAF7            |
| Ubiquitination-mediated degradation component,<br>putative OS=Plasmodium falciparum (isolate<br>3D7) GN=PF08_0020 PE=4 SV=1 | C0H4Y0_PLAF7            |
| Putative uncharacterized protein<br>OS=Plasmodium falciparum (isolate 3D7)<br>GN=PF07_0016 PE=4 SV=1                        | Q8IC27_PLAF7            |
| Vacuolar ATP synthase subunit E, putative<br>OS=Plasmodium falciparum (isolate 3D7)<br>GN=PFI1670c PE=3 SV=2                | Q8I2H3_PLAF7            |
| V-type ATPase, subunit C, putative<br>OS=Plasmodium falciparum (isolate 3D7)<br>GN=PFA_0300c PE=4 SV=1                      | Q8I280_PLAF7            |
| Arginyl-tRNA synthetase, putative<br>OS=Plasmodium falciparum (isolate 3D7)<br>GN=PFL0900c PE=3 SV=1                        | Q8I5M2_PLAF7            |
| Conserved Plasmodium protein OS=Plasmodium<br>falciparum (isolate 3D7) GN=PF11_0332 PE=4<br>SV=1                            | Q8II42_PLAF7            |
| Putative uncharacterized protein<br>OS=Plasmodium falciparum (isolate 3D7)<br>GN=PFE0990w PE=4 SV=1                         | C0H4F1_PLAF7            |
| Proteasome, putative OS=Plasmodium<br>falciparum (isolate 3D7) GN=PFI1545c PE=4<br>SV=1                                     | Q8IOU7_PLAF7            |

| <i>Protein</i>                                                                                                          | <i>Accession Number</i> |
|-------------------------------------------------------------------------------------------------------------------------|-------------------------|
| DNA-directed RNA polymerase OS=Plasmodium falciparum (isolate 3D7) GN=PFC0805w PE=3 SV=1                                | O77375_PLAF7            |
| P-type calcium transporting ATPase OS=Plasmodium falciparum GN=serca PE=3 SV=1                                          | E1CC54_PLAFA            |
| 60S ribosomal protein L23a, putative OS=Plasmodium falciparum (isolate 3D7) GN=PF13_0132 PE=3 SV=1                      | Q8IE82_PLAF7            |
| Coatamer alpha subunit, putative OS=Plasmodium falciparum (isolate 3D7) GN=PFF0330w PE=4 SV=1                           | C6KSR5_PLAF7            |
| Pfmdr2 protein OS=Plasmodium falciparum GN=pfmdr2 PE=3 SV=1                                                             | Q25693_PLAFA            |
| 60S ribosomal protein L14, putative OS=Plasmodium falciparum (isolate 3D7) GN=PF14_0296 PE=4 SV=1                       | Q8ILE8_PLAF7            |
| Heat shock protein 90, putative OS=Plasmodium falciparum (isolate 3D7) GN=PF11_0188 PE=3 SV=1                           | Q8III6_PLAF7            |
| ORF 2 protein (Fragment) OS=Plasmodium falciparum GN=ORF 2 PE=2 SV=1                                                    | Q02602_PLAFA            |
| Ring-exported protein 1 OS=Plasmodium falciparum (isolate 3D7) GN=REX1 PE=4 SV=1                                        | Q8I2G1_PLAF7            |
| 40S ribosomal protein S24 OS=Plasmodium falciparum (isolate 3D7) GN=PFE0975c PE=3 SV=1                                  | Q8I3R6_PLAF7            |
| Glutamate--cysteine ligase (Gamma-glutamylcysteine synthetase) OS=Plasmodium falciparum GN=GCS PE=2 SV=1                | Q9TY17_PLAFA            |
| Activator of Hsp90 ATPase homolog 1-like protein, putative OS=Plasmodium falciparum (isolate 3D7) GN=PFC0360w PE=4 SV=2 | O97256_PLAF7            |
| Ubiquitin conjugating enzyme E2, putative OS=Plasmodium falciparum (isolate 3D7) GN=PFL0190w PE=3 SV=1                  | Q8I607_PLAF7            |
| Coatamer protein, beta subunit, putative OS=Plasmodium falciparum (isolate 3D7) GN=PF14_0277 PE=4 SV=2                  | Q8ILG6_PLAF7            |
| Putative uncharacterized protein OS=Plasmodium falciparum (isolate 3D7) GN=MAL8P1.62 PE=4 SV=1                          | Q8IB31_PLAF7            |
| 60S ribosomal protein L36 OS=Plasmodium falciparum (isolate 3D7) GN=PF11_0106 PE=3 SV=2                                 | Q8I713_PLAF7            |

| <i>Protein</i>                                                                                                          | <i>Accession Number</i> |
|-------------------------------------------------------------------------------------------------------------------------|-------------------------|
| Serine rich protein homologue OS=Plasmodium falciparum PE=3 SV=1                                                        | Q26015_PLAFA            |
| 6-cysteine protein, putative OS=Plasmodium falciparum (isolate 3D7) GN=Pf41 PE=4 SV=1                                   | Q811Y0_PLAF7            |
| DNA replication licensing factor mcm7 homologue, putative OS=Plasmodium falciparum (isolate 3D7) GN=PF07_0023 PE=3 SV=1 | Q81C16_PLAF7            |
| Rab2, GTPase OS=Plasmodium falciparum (isolate 3D7) GN=Rab2 PE=3 SV=1                                                   | Q815A9_PLAF7            |
| Cytidine triphosphate synthetase OS=Plasmodium falciparum (isolate 3D7) GN=PF14_0100 PE=4 SV=1                          | Q81LZ3_PLAF7            |
| Ubiquitin carboxyl-terminal hydrolase OS=Plasmodium falciparum (isolate 3D7) GN=PFE1355c PE=3 SV=1                      | Q813J3_PLAF7            |
| Glycogen synthase kinase 3 OS=Plasmodium falciparum (isolate 3D7) GN=PfGSK-3 PE=4 SV=2                                  | O77344_PLAF7            |
| Acetyl-CoA synthetase OS=Plasmodium falciparum (isolate 3D7) GN=PFF1350c PE=4 SV=1                                      | C6KTB4_PLAF7            |
| DNAJ protein, putative OS=Plasmodium falciparum (isolate 3D7) GN=PF08_0032 PE=4 SV=1                                    | Q81B72_PLAF7            |
| DNA topoisomerase 2 OS=Plasmodium falciparum (isolate 3D7) GN=PF14_0316 PE=3 SV=1                                       | Q81LC8_PLAF7            |
| Conserved Plasmodium protein OS=Plasmodium falciparum (isolate 3D7) GN=PFL0895c PE=4 SV=1                               | Q815M3_PLAF7            |
| Spermidine synthase OS=Plasmodium falciparum (isolate 3D7) GN=PF11_0301 PE=1 SV=1                                       | Q81I73_PLAF7            |
| Putative uncharacterized protein OS=Plasmodium falciparum (isolate 3D7) GN=PF08_0137 PE=4 SV=1                          | Q81AK9_PLAF7            |
| PfSec23 protein OS=Plasmodium falciparum (isolate 3D7) GN=Pfsec23 PE=2 SV=1                                             | Q81B60_PLAF7            |
| Replication factor C subunit 1 OS=Plasmodium falciparum GN=rfc1 PE=4 SV=1                                               | Q9GQW6_PLAFA            |
| 60S ribosomal protein L8, putative OS=Plasmodium falciparum (isolate 3D7) GN=PFE0845c PE=4 SV=1                         | Q813T9_PLAF7            |

| <i>Protein</i>                                                                                                            | <i>Accession Number</i> |
|---------------------------------------------------------------------------------------------------------------------------|-------------------------|
| Ubiquitin carboxyl-terminal hydrolase a, putative<br>OS=Plasmodium falciparum (isolate 3D7)<br>GN=PF0680c PE=4 SV=1       | Q811U8_PLAF7            |
| Orotate phosphoribosyltransferase<br>OS=Plasmodium falciparum GN=opr1 PE=2 SV=1                                           | Q8N0R1_PLAFA            |
| Calmodulin OS=Plasmodium falciparum (isolate 3D7)<br>GN=PF14_0323 PE=3 SV=2                                               | CALM_PLAF7              |
| Haloacid dehalogenase-like hydrolase, putative<br>OS=Plasmodium falciparum (isolate 3D7)<br>GN=PF11_0190 PE=4 SV=1        | Q8III4_PLAF7            |
| Thymidylate kinase, putative OS=Plasmodium falciparum (isolate 3D7)<br>GN=TMK PE=1 SV=1                                   | Q8I4S1_PLAF7            |
| Myosin-A OS=Plasmodium falciparum (isolate FCBR / Columbia)<br>PE=2 SV=1                                                  | MYOA_PLAFB              |
| Probable DNA-directed RNA polymerase II subunit RPB11<br>OS=Plasmodium falciparum (isolate 3D7)<br>GN=PF13_0023 PE=3 SV=1 | RPB11_PLAF7             |
| Zinc finger protein, putative OS=Plasmodium falciparum (isolate 3D7)<br>GN=PF13_0313 PE=4 SV=1                            | Q8IDC0_PLAF7            |
| 60S ribosomal protein L28, putative<br>OS=Plasmodium falciparum (isolate 3D7)<br>GN=PF11_0437 PE=4 SV=1                   | Q8IHU0_PLAF7            |
