# Supplementary material for: Effects of cyclin-dependent kinase inhibitor Purvalanol B application on protein expression and developmental progression in intra-erythrocytic Plasmodium falciparum parasites
Source: Springer Nature journal article supplement (doi:10.1186/s12936-015-0655-x), 2015-04-07

## Cellular Component

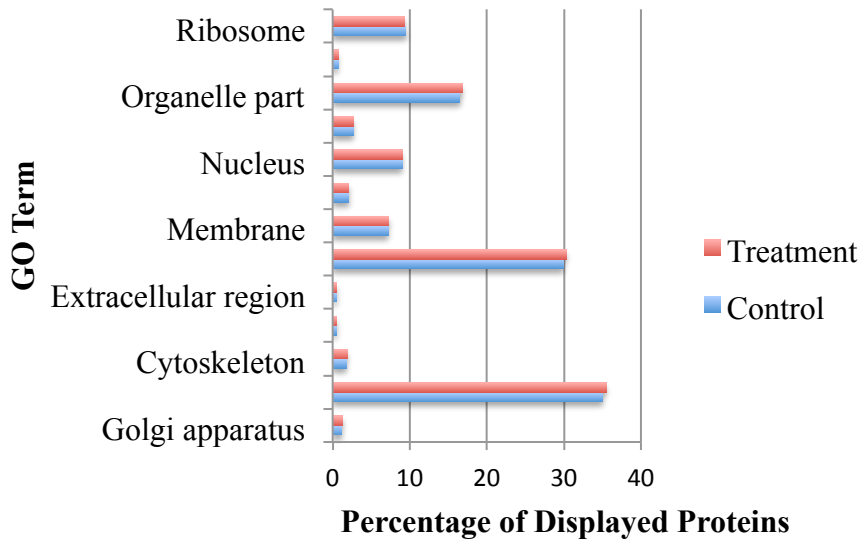

## Molecular Function or Activity

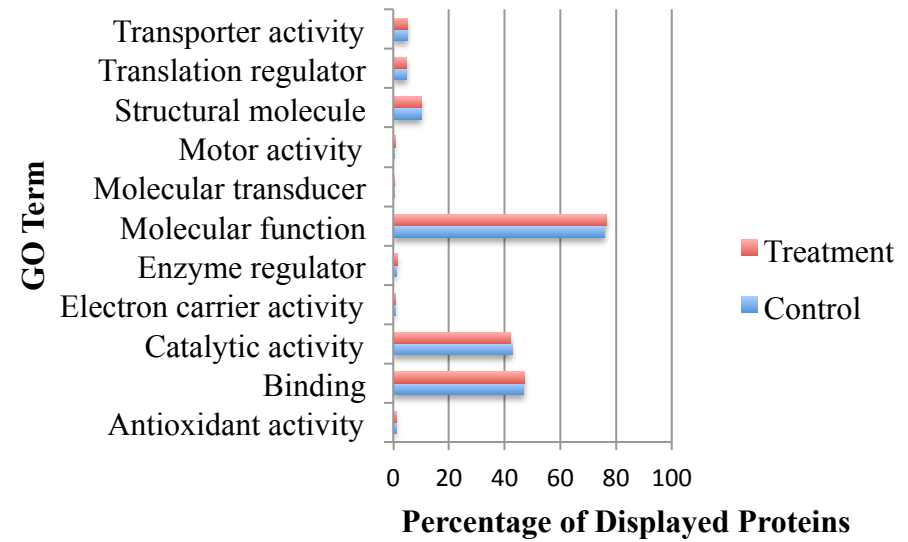

## Biological Process

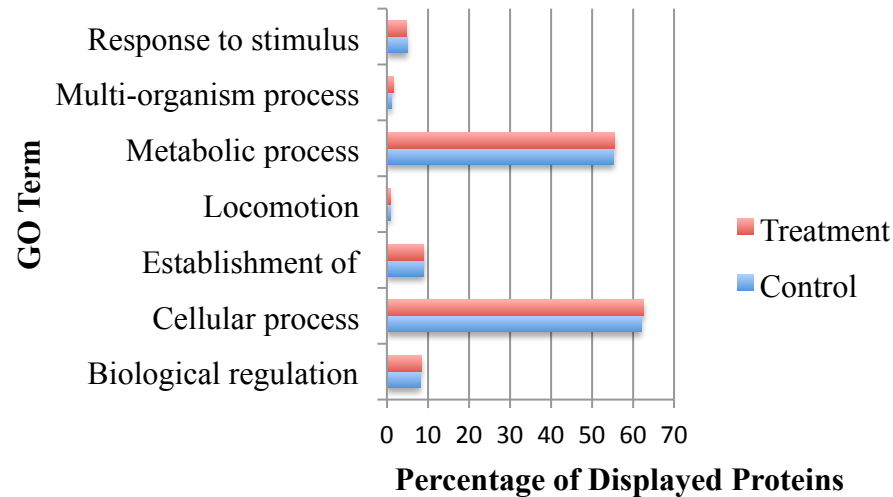

Supplement: MOESM3 [file 9761184]
